# Supplementary material
Source: publisher figshare collection journal article supplement (https://acs.figshare.com/ndownloader/files/5180077)
Supplement: Supplementary file 1 [file 5180077]

data_1 
_audit_creation_date             'November 25, 2001' 
_audit_creation_method            SHELXL-97 
_audit_update_record
;
  December_21_2001 text and data added by Mark S. Mashuta
  Oct_6_2003 text and data added by Mark S. Mashuta
;
_chemical_name_systematic 
; 
 [(bmmp-TASN)Ni] 
; 
_chemical_name_common              [(bmmp-TASN)Ni] 
_chemical_melting_point           ? 
_chemical_formula_moiety          'C12 H26 N2 Ni S2' 
_chemical_formula_sum             'C12 H26 N2 Ni S2' 
_chemical_formula_weight          321.18 
  
loop_ 
 _atom_type_symbol 
 _atom_type_description 
 _atom_type_scat_dispersion_real 
 _atom_type_scat_dispersion_imag 
 _atom_type_scat_source 
 'C'  'C'   0.0033   0.0016 
 'International Tables Vol C Tables 4.2.6.8 and 6.1.1.4' 
 'H'  'H'   0.0000   0.0000 
 'International Tables Vol C Tables 4.2.6.8 and 6.1.1.4' 
 'N'  'N'   0.0061   0.0033 
 'International Tables Vol C Tables 4.2.6.8 and 6.1.1.4' 
 'S'  'S'   0.1246   0.1234 
 'International Tables Vol C Tables 4.2.6.8 and 6.1.1.4' 
 'Ni'  'Ni'   0.3393   1.1124 
 'International Tables Vol C Tables 4.2.6.8 and 6.1.1.4' 
  
_symmetry_cell_setting            Monoclinic 
_symmetry_space_group_name_H-M    'P 21/n' 
_symmetry_space_group_name_Hall    '-P 2yn' 
  
loop_ 
 _symmetry_equiv_pos_as_xyz 
 'x, y, z' 
 '-x+1/2, y+1/2, -z+1/2' 
 '-x, -y, -z' 
 'x-1/2, -y-1/2, z-1/2' 
  
_cell_length_a                    6.1621(10) 
_cell_length_b                    20.7343(10) 
_cell_length_c                    12.3340(10) 
_cell_angle_alpha                 90.00 
_cell_angle_beta                  98.562(10) 
_cell_angle_gamma                 90.00 
_cell_volume                      1558.3(3) 
_cell_formula_units_Z             4 
_cell_measurement_temperature     293(2)
_cell_measurement_reflns_used     25
_cell_measurement_theta_min       15.0
_cell_measurement_theta_max       18.0
_exptl_crystal_description        'block'
_exptl_crystal_colour             'purple'
_exptl_crystal_size_max           0.48
_exptl_crystal_size_mid           0.23
_exptl_crystal_size_min           0.17
_exptl_crystal_density_meas       'not measured'
_exptl_crystal_density_diffrn     1.369
_exptl_crystal_density_method     'not measured'
_exptl_crystal_F_000              688
_exptl_absorpt_coefficient_mu     1.496
_exptl_absorpt_correction_type    empirical
_exptl_absorpt_correction_T_min   0.667
_exptl_absorpt_correction_T_max   0.775
_exptl_absorpt_process_details    psi-scan
_diffrn_ambient_temperature       293(2)
_diffrn_radiation_wavelength      0.71073
_diffrn_radiation_type            MoK\a
_diffrn_radiation_source          'normal focus Philips Mo tube'
_diffrn_radiation_monochromator   'equatorial mounted graphite'
_diffrn_measurement_device_type   'CAD4'
_diffrn_measurement_method        'data from \w/2\q_scans'
_diffrn_radiation_detector        'scintillation counter'
_diffrn_standards_number          3
_diffrn_standards_interval_time   60
_diffrn_standards_decay_%         'not applied (less than 0.5)'
_diffrn_reflns_number             2873 
_diffrn_reflns_av_R_equivalents   0.0526 
_diffrn_reflns_av_sigmaI/netI     0.0244 
_diffrn_reflns_limit_h_min        -7 
_diffrn_reflns_limit_h_max        7 
_diffrn_reflns_limit_k_min        0 
_diffrn_reflns_limit_k_max        24 
_diffrn_reflns_limit_l_min        0 
_diffrn_reflns_limit_l_max        14 
_diffrn_reflns_theta_min          2.58 
_diffrn_reflns_theta_max          25.01 
_reflns_number_total              2742 
_reflns_number_gt                 2395 
_reflns_threshold_expression      >2sigma(I) 
  
_computing_data_collection        'Enraf-Nonius Diffractometer Control'
_computing_cell_refinement        'Enraf-Nonius Diffractometer Control'
_computing_data_reduction         'Bruker SHELXTL'
_computing_structure_solution     'SHELXS-97 (Sheldrick, 1990)'
_computing_structure_refinement   'SHELXL-97 (Sheldrick, 1997)'
_computing_molecular_graphics     'SHELXTL 6.12 (Bruker, 2001)'
_computing_publication_material   'SHELXTL 6.12 (Bruker, 2001)'
_refine_special_details
; 
 Refinement of F^2^ against ALL reflections.  The weighted R-factor wR and 
 goodness of fit S are based on F^2^.
; 
  
_refine_ls_structure_factor_coef  Fsqd 
_refine_ls_matrix_type            full 
_refine_ls_weighting_scheme       calc 
_refine_ls_weighting_details 
 'calc w=1/[\s^2^(Fo^2^)+(0.0797P)^2^+1.1806P] where P=(Fo^2^+2Fc^2^)/3' 
_atom_sites_solution_primary      direct 
_atom_sites_solution_secondary    difmap 
_atom_sites_solution_hydrogens    geom 
_refine_ls_hydrogen_treatment     mixed 
_refine_ls_extinction_method      SHELXL 
_refine_ls_extinction_coef        0.0069(13) 
_refine_ls_extinction_expression 
 'Fc^*^=kFc[1+0.001xFc^2^\l^3^/sin(2\q)]^-1/4^' 
_refine_ls_number_reflns          2742 
_refine_ls_number_parameters      155 
_refine_ls_number_restraints      0 
_refine_ls_R_factor_all           0.0577 
_refine_ls_R_factor_gt            0.0487 
_refine_ls_wR_factor_ref          0.1294 
_refine_ls_wR_factor_gt           0.1222 
_refine_ls_goodness_of_fit_ref    1.088 
_refine_ls_restrained_S_all       1.088 
_refine_ls_shift/su_max           0.000 
_refine_ls_shift/su_mean          0.000 
  
loop_ 
 _atom_site_label 
 _atom_site_type_symbol 
 _atom_site_fract_x 
 _atom_site_fract_y 
 _atom_site_fract_z 
 _atom_site_U_iso_or_equiv 
 _atom_site_adp_type 
 _atom_site_occupancy 
 _atom_site_symmetry_multiplicity 
 _atom_site_calc_flag 
 _atom_site_refinement_flags 
 _atom_site_disorder_assembly 
 _atom_site_disorder_group 
Ni Ni 0.64334(7) 0.223246(19) 0.92195(3) 0.0323(2) Uani 1 1 d . . . 
S1 S 0.68408(19) 0.30984(4) 0.83155(8) 0.0484(3) Uani 1 1 d . . . 
N1 N 0.5333(5) 0.27368(13) 1.0335(2) 0.0365(7) Uani 1 1 d . . . 
C1 C 0.6369(6) 0.37275(17) 0.9318(3) 0.0407(8) Uani 1 1 d . . . 
S2 S 0.7031(2) 0.15844(5) 0.79238(9) 0.0623(4) Uani 1 1 d . . . 
N2 N 0.6548(5) 0.14925(14) 1.0202(2) 0.0363(6) Uani 1 1 d . . . 
C2 C 0.6261(6) 0.33957(17) 1.0422(3) 0.0441(9) Uani 1 1 d . . . 
H2A H 0.7732 0.3376 1.0830 0.053 Uiso 1 1 calc R . . 
H2B H 0.5382 0.3660 1.0839 0.053 Uiso 1 1 calc R . . 
C3 C 0.5852(7) 0.23851(19) 1.1384(3) 0.0476(9) Uani 1 1 d . . . 
H3A H 0.4935 0.2539 1.1904 0.057 Uiso 1 1 calc R . . 
H3B H 0.7376 0.2452 1.1694 0.057 Uiso 1 1 calc R . . 
C4 C 0.5425(7) 0.16717(18) 1.1149(3) 0.0441(9) Uani 1 1 d . . . 
H4A H 0.5996 0.1416 1.1786 0.053 Uiso 1 1 calc R . . 
H4B H 0.3861 0.1593 1.0973 0.053 Uiso 1 1 calc R . . 
C5 C 0.5470(7) 0.09357(17) 0.9594(3) 0.0443(9) Uani 1 1 d . . . 
H5A H 0.3896 0.1006 0.9481 0.053 Uiso 1 1 calc R . . 
H5B H 0.5761 0.0552 1.0043 0.053 Uiso 1 1 calc R . . 
C6 C 0.6209(7) 0.08100(17) 0.8474(3) 0.0463(9) Uani 1 1 d . . . 
C7 C 0.4369(7) 0.4130(2) 0.8876(4) 0.0579(11) Uani 1 1 d . . . 
H7A H 0.4139 0.4453 0.9405 0.087 Uiso 1 1 calc R . . 
H7B H 0.3102 0.3857 0.8739 0.087 Uiso 1 1 calc R . . 
H7C H 0.4605 0.4335 0.8205 0.087 Uiso 1 1 calc R . . 
C8 C 0.8337(7) 0.41860(19) 0.9476(4) 0.0585(11) Uani 1 1 d . . . 
H8A H 0.8108 0.4514 0.9996 0.088 Uiso 1 1 calc R . . 
H8B H 0.8494 0.4383 0.8788 0.088 Uiso 1 1 calc R . . 
H8C H 0.9644 0.3948 0.9744 0.088 Uiso 1 1 calc R . . 
C9 C 0.2883(7) 0.2771(2) 1.0019(4) 0.0539(10) Uani 1 1 d . . . 
H9A H 0.2264 0.3019 1.0554 0.081 Uiso 1 1 calc R . . 
H9B H 0.2281 0.2344 0.9986 0.081 Uiso 1 1 calc R . . 
H9C H 0.2539 0.2973 0.9313 0.081 Uiso 1 1 calc R . . 
C10 C 0.8883(6) 0.1344(2) 1.0611(3) 0.0544(10) Uani 1 1 d . . . 
H10A H 0.8965 0.0980 1.1097 0.082 Uiso 1 1 calc R . . 
H10B H 0.9563 0.1711 1.0998 0.082 Uiso 1 1 calc R . . 
H10C H 0.9632 0.1245 1.0002 0.082 Uiso 1 1 calc R . . 
C11 C 0.4222(9) 0.0544(2) 0.7713(4) 0.0733(14) Uani 1 1 d . . . 
H11A H 0.3783 0.0141 0.7996 0.110 Uiso 1 1 calc R . . 
H11B H 0.4605 0.0478 0.6994 0.110 Uiso 1 1 calc R . . 
H11C H 0.3031 0.0846 0.7670 0.110 Uiso 1 1 calc R . . 
C12 C 0.8059(8) 0.0322(2) 0.8526(4) 0.0682(13) Uani 1 1 d . . . 
H12A H 0.7608 -0.0077 0.8817 0.102 Uiso 1 1 calc R . . 
H12B H 0.9330 0.0483 0.8991 0.102 Uiso 1 1 calc R . . 
H12C H 0.8408 0.0251 0.7802 0.102 Uiso 1 1 calc R . . 
  
loop_ 
 _atom_site_aniso_label 
 _atom_site_aniso_U_11 
 _atom_site_aniso_U_22 
 _atom_site_aniso_U_33 
 _atom_site_aniso_U_23 
 _atom_site_aniso_U_13 
 _atom_site_aniso_U_12 
Ni 0.0446(3) 0.0246(3) 0.0315(3) 0.00059(16) 0.01787(19) -0.00011(17) 
S1 0.0799(7) 0.0305(5) 0.0411(5) 0.0055(4) 0.0302(5) 0.0064(4) 
N1 0.0442(16) 0.0315(16) 0.0366(16) 0.0003(12) 0.0146(13) 0.0011(12) 
C1 0.050(2) 0.0276(17) 0.047(2) -0.0027(15) 0.0161(16) 0.0030(15) 
S2 0.1160(10) 0.0326(5) 0.0494(6) -0.0049(4) 0.0481(6) -0.0093(5) 
N2 0.0448(16) 0.0310(15) 0.0361(15) 0.0026(12) 0.0154(12) -0.0004(12) 
C2 0.057(2) 0.0310(18) 0.047(2) -0.0059(16) 0.0184(17) 0.0023(16) 
C3 0.069(3) 0.043(2) 0.0345(19) 0.0017(16) 0.0215(17) 0.0031(19) 
C4 0.062(2) 0.0358(19) 0.0391(19) 0.0061(15) 0.0225(17) 0.0032(17) 
C5 0.058(2) 0.0308(18) 0.047(2) 0.0004(16) 0.0180(17) -0.0085(16) 
C6 0.072(3) 0.0281(18) 0.042(2) -0.0030(15) 0.0192(18) -0.0024(17) 
C7 0.063(3) 0.041(2) 0.070(3) 0.003(2) 0.015(2) 0.0149(19) 
C8 0.068(3) 0.035(2) 0.074(3) 0.004(2) 0.016(2) -0.0064(19) 
C9 0.047(2) 0.056(3) 0.063(3) -0.001(2) 0.0208(19) 0.0009(18) 
C10 0.054(2) 0.054(3) 0.056(2) -0.001(2) 0.0091(19) 0.0051(19) 
C11 0.101(4) 0.059(3) 0.058(3) -0.007(2) 0.003(3) -0.011(3) 
C12 0.092(3) 0.042(2) 0.076(3) -0.007(2) 0.033(3) 0.011(2) 
  
_geom_special_details 
; 

; 
  
loop_ 
 _geom_bond_atom_site_label_1 
 _geom_bond_atom_site_label_2 
 _geom_bond_distance 
 _geom_bond_site_symmetry_2 
 _geom_bond_publ_flag 
Ni N1 1.930(3) . no 
Ni N2 1.950(3) . no 
Ni S1 2.1479(10) . no 
Ni S2 2.1612(10) . no 
S1 C1 1.849(4) . no 
N1 C3 1.478(4) . no 
N1 C2 1.479(4) . no 
N1 C9 1.504(5) . no 
C1 C7 1.521(5) . no 
C1 C8 1.530(5) . no 
C1 C2 1.536(5) . no 
S2 C6 1.843(4) . no 
N2 C5 1.479(4) . no 
N2 C10 1.485(5) . no 
N2 C4 1.490(4) . no 
C2 H2A 0.9700 . no 
C2 H2B 0.9700 . no 
C3 C4 1.523(5) . no 
C3 H3A 0.9700 . no 
C3 H3B 0.9700 . no 
C4 H4A 0.9700 . no 
C4 H4B 0.9700 . no 
C5 C6 1.540(5) . no 
C5 H5A 0.9700 . no 
C5 H5B 0.9700 . no 
C6 C12 1.519(6) . no 
C6 C11 1.531(6) . no 
C7 H7A 0.9600 . no 
C7 H7B 0.9600 . no 
C7 H7C 0.9600 . no 
C8 H8A 0.9600 . no 
C8 H8B 0.9600 . no 
C8 H8C 0.9600 . no 
C9 H9A 0.9600 . no 
C9 H9B 0.9600 . no 
C9 H9C 0.9600 . no 
C10 H10A 0.9600 . no 
C10 H10B 0.9600 . no 
C10 H10C 0.9600 . no 
C11 H11A 0.9600 . no 
C11 H11B 0.9600 . no 
C11 H11C 0.9600 . no 
C12 H12A 0.9600 . no 
C12 H12B 0.9600 . no 
C12 H12C 0.9600 . no 
  
loop_ 
 _geom_angle_atom_site_label_1 
 _geom_angle_atom_site_label_2 
 _geom_angle_atom_site_label_3 
 _geom_angle 
 _geom_angle_site_symmetry_1 
 _geom_angle_site_symmetry_3 
 _geom_angle_publ_flag 
N1 Ni N2 88.11(12) . . no 
N1 Ni S1 89.87(9) . . no 
N2 Ni S1 169.79(9) . . no 
N1 Ni S2 168.75(10) . . no 
N2 Ni S2 88.63(9) . . no 
S1 Ni S2 95.16(4) . . no 
C1 S1 Ni 101.57(12) . . no 
C3 N1 C2 111.2(3) . . no 
C3 N1 C9 109.2(3) . . no 
C2 N1 C9 109.7(3) . . no 
C3 N1 Ni 107.7(2) . . no 
C2 N1 Ni 112.3(2) . . no 
C9 N1 Ni 106.6(2) . . no 
C7 C1 C8 106.8(3) . . no 
C7 C1 C2 115.1(3) . . no 
C8 C1 C2 107.6(3) . . no 
C7 C1 S1 110.3(3) . . no 
C8 C1 S1 108.9(3) . . no 
C2 C1 S1 108.0(2) . . no 
C6 S2 Ni 100.54(12) . . no 
C5 N2 C10 110.5(3) . . no 
C5 N2 C4 111.5(3) . . no 
C10 N2 C4 109.0(3) . . no 
C5 N2 Ni 109.1(2) . . no 
C10 N2 Ni 108.5(2) . . no 
C4 N2 Ni 108.2(2) . . no 
N1 C2 C1 114.7(3) . . no 
N1 C2 H2A 108.6 . . no 
C1 C2 H2A 108.6 . . no 
N1 C2 H2B 108.6 . . no 
C1 C2 H2B 108.6 . . no 
H2A C2 H2B 107.6 . . no 
N1 C3 C4 107.7(3) . . no 
N1 C3 H3A 110.2 . . no 
C4 C3 H3A 110.2 . . no 
N1 C3 H3B 110.2 . . no 
C4 C3 H3B 110.2 . . no 
H3A C3 H3B 108.5 . . no 
N2 C4 C3 107.7(3) . . no 
N2 C4 H4A 110.2 . . no 
C3 C4 H4A 110.2 . . no 
N2 C4 H4B 110.2 . . no 
C3 C4 H4B 110.2 . . no 
H4A C4 H4B 108.5 . . no 
N2 C5 C6 114.6(3) . . no 
N2 C5 H5A 108.6 . . no 
C6 C5 H5A 108.6 . . no 
N2 C5 H5B 108.6 . . no 
C6 C5 H5B 108.6 . . no 
H5A C5 H5B 107.6 . . no 
C12 C6 C11 108.2(4) . . no 
C12 C6 C5 113.3(3) . . no 
C11 C6 C5 107.2(4) . . no 
C12 C6 S2 110.5(3) . . no 
C11 C6 S2 109.1(3) . . no 
C5 C6 S2 108.5(2) . . no 
C1 C7 H7A 109.5 . . no 
C1 C7 H7B 109.5 . . no 
H7A C7 H7B 109.5 . . no 
C1 C7 H7C 109.5 . . no 
H7A C7 H7C 109.5 . . no 
H7B C7 H7C 109.5 . . no 
C1 C8 H8A 109.5 . . no 
C1 C8 H8B 109.5 . . no 
H8A C8 H8B 109.5 . . no 
C1 C8 H8C 109.5 . . no 
H8A C8 H8C 109.5 . . no 
H8B C8 H8C 109.5 . . no 
N1 C9 H9A 109.5 . . no 
N1 C9 H9B 109.5 . . no 
H9A C9 H9B 109.5 . . no 
N1 C9 H9C 109.5 . . no 
H9A C9 H9C 109.5 . . no 
H9B C9 H9C 109.5 . . no 
N2 C10 H10A 109.5 . . no 
N2 C10 H10B 109.5 . . no 
H10A C10 H10B 109.5 . . no 
N2 C10 H10C 109.5 . . no 
H10A C10 H10C 109.5 . . no 
H10B C10 H10C 109.5 . . no 
C6 C11 H11A 109.5 . . no 
C6 C11 H11B 109.5 . . no 
H11A C11 H11B 109.5 . . no 
C6 C11 H11C 109.5 . . no 
H11A C11 H11C 109.5 . . no 
H11B C11 H11C 109.5 . . no 
C6 C12 H12A 109.5 . . no 
C6 C12 H12B 109.5 . . no 
H12A C12 H12B 109.5 . . no 
C6 C12 H12C 109.5 . . no 
H12A C12 H12C 109.5 . . no 
H12B C12 H12C 109.5 . . no 
  
_diffrn_measured_fraction_theta_max    0.996 
_diffrn_reflns_theta_full              25.01 
_diffrn_measured_fraction_theta_full   0.996 
_refine_diff_density_max    1.146 
_refine_diff_density_min   -0.662 
_refine_diff_density_rms    0.107 

#===END

data_2 
_audit_creation_date             'Jan 21, 2002' 
_audit_creation_method            SHELXL-97 
_audit_update_record
;
  Jan_21_2002 text and data added by Mark S. Mashuta
  Oct_7_2003 text and data added by Mark S. Mashuta
;
_chemical_name_systematic 
; 
 [(bmmp-TASN)Ni] 
; 
_chemical_name_common              [(bmmp-TASN)Ni] 
_chemical_melting_point           ? 
_chemical_formula_moiety        'C12 H26 N2 Ni O2 S2'
_chemical_formula_sum           'C12 H26 N2 Ni O2 S2' 
_chemical_formula_weight          353.18 
  
loop_ 
 _atom_type_symbol 
 _atom_type_description 
 _atom_type_scat_dispersion_real 
 _atom_type_scat_dispersion_imag 
 _atom_type_scat_source 
 'C'  'C'   0.0033   0.0016 
 'International Tables Vol C Tables 4.2.6.8 and 6.1.1.4' 
 'H'  'H'   0.0000   0.0000 
 'International Tables Vol C Tables 4.2.6.8 and 6.1.1.4' 
 'N'  'N'   0.0061   0.0033 
 'International Tables Vol C Tables 4.2.6.8 and 6.1.1.4' 
 'O'  'O'   0.0106   0.0060 
 'International Tables Vol C Tables 4.2.6.8 and 6.1.1.4' 
 'S'  'S'   0.1246   0.1234 
 'International Tables Vol C Tables 4.2.6.8 and 6.1.1.4' 
 'Ni'  'Ni'   0.3393   1.1124 
 'International Tables Vol C Tables 4.2.6.8 and 6.1.1.4' 
  
_symmetry_cell_setting            Monoclinic 
_symmetry_space_group_name_H-M    'P 21/n' 
_symmetry_space_group_name_Hall    '-P 2yn' 
  
  
loop_ 
 _symmetry_equiv_pos_as_xyz 
 'x, y, z' 
 '-x+1/2, y+1/2, -z+1/2' 
 '-x, -y, -z' 
 'x-1/2, -y-1/2, z-1/2' 
  
_cell_length_a                    6.6040(13) 
_cell_length_b                    12.515(3) 
_cell_length_c                    20.482(4) 
_cell_angle_alpha                 90.00 
_cell_angle_beta                  97.63(3) 
_cell_angle_gamma                 90.00 
_cell_volume                      1677.8(6) 
_cell_formula_units_Z             4 
_cell_measurement_temperature     293(2) 
_cell_measurement_reflns_used     25
_cell_measurement_theta_min       15.0
_cell_measurement_theta_max       18.0
_exptl_crystal_description        'block'
_exptl_crystal_colour             'orange'
_exptl_crystal_size_max           0.49
_exptl_crystal_size_mid           0.26
_exptl_crystal_size_min           0.17
_exptl_crystal_density_meas       'not measured'
_exptl_crystal_density_diffrn     1.398 
_exptl_crystal_density_method     'not measured' 
_exptl_crystal_F_000              752 
_exptl_absorpt_coefficient_mu     1.405 
_exptl_absorpt_correction_type    empirical 
_exptl_absorpt_correction_T_min   0.652 
_exptl_absorpt_correction_T_max   0.781 
_exptl_absorpt_process_details    psi-scan
_diffrn_ambient_temperature       293(2)
_diffrn_radiation_wavelength      0.71073
_diffrn_radiation_type            MoK\a
_diffrn_radiation_source          'normal focus Philips Mo tube'
_diffrn_radiation_monochromator   'equatorial mounted graphite'
_diffrn_measurement_device_type   'CAD4'
_diffrn_measurement_method        'data from \w/2\q_scans'
_diffrn_radiation_detector        'scintillation counter'
_diffrn_standards_number          3
_diffrn_standards_interval_time   60
_diffrn_standards_decay_%         'not applied (less than 0.5)'
_diffrn_reflns_number             7686 
_diffrn_reflns_av_R_equivalents   0.0776 
_diffrn_reflns_av_sigmaI/netI     0.0814 
_diffrn_reflns_limit_h_min        -8 
_diffrn_reflns_limit_h_max        8 
_diffrn_reflns_limit_k_min        0 
_diffrn_reflns_limit_k_max        16 
_diffrn_reflns_limit_l_min        -26 
_diffrn_reflns_limit_l_max        26 
_diffrn_reflns_theta_min          2.01 
_diffrn_reflns_theta_max          27.46 
_reflns_number_total              3846 
_reflns_number_gt                 2999 
_reflns_threshold_expression      >2sigma(I) 
  
  
_computing_data_collection        'Enraf-Nonius Diffractometer Control'
_computing_cell_refinement        'Enraf-Nonius Diffractometer Control'
_computing_data_reduction         'Bruker SHELXTL'
_computing_structure_solution     'SHELXS-97 (Sheldrick, 1990)'
_computing_structure_refinement   'SHELXL-97 (Sheldrick, 1997)'
_computing_molecular_graphics     'SHELXTL 6.12 (Bruker, 2001)'
_computing_publication_material   'SHELXTL 6.12 (Bruker, 2001)'
_refine_special_details
; 
 Refinement of F^2^ against ALL reflections.  The weighted R-factor wR and 
 goodness of fit S are based on F^2^.
; 
  
_refine_ls_structure_factor_coef  Fsqd 
_refine_ls_matrix_type            full 
_refine_ls_weighting_scheme       calc 
_refine_ls_weighting_details 
 'calc w=1/[\s^2^(Fo^2^)+(0.0186P)^2^+1.3644P] where P=(Fo^2^+2Fc^2^)/3' 
_atom_sites_solution_primary      direct 
_atom_sites_solution_secondary    difmap 
_atom_sites_solution_hydrogens    geom 
_refine_ls_hydrogen_treatment     mixed 
_refine_ls_extinction_method      SHELXL 
_refine_ls_extinction_coef        0.0073(4) 
_refine_ls_extinction_expression 
 'Fc^*^=kFc[1+0.001xFc^2^\l^3^/sin(2\q)]^-1/4^' 
_refine_ls_number_reflns          3846 
_refine_ls_number_parameters      178 
_refine_ls_number_restraints      0 
_refine_ls_R_factor_all           0.0575 
_refine_ls_R_factor_gt            0.0393 
_refine_ls_wR_factor_ref          0.0957 
_refine_ls_wR_factor_gt           0.0863 
_refine_ls_goodness_of_fit_ref    1.008 
_refine_ls_restrained_S_all       1.008 
_refine_ls_shift/su_max           0.001 
_refine_ls_shift/su_mean          0.000 
  
loop_ 
 _atom_site_label 
 _atom_site_type_symbol 
 _atom_site_fract_x 
 _atom_site_fract_y 
 _atom_site_fract_z 
 _atom_site_U_iso_or_equiv 
 _atom_site_adp_type 
 _atom_site_occupancy 
 _atom_site_symmetry_multiplicity 
 _atom_site_calc_flag 
 _atom_site_refinement_flags 
 _atom_site_disorder_assembly 
 _atom_site_disorder_group 
Ni Ni 0.01997(5) 0.60025(3) 0.735069(15) 0.03031(11) Uani 1 1 d . . . 
S1 S 0.13817(13) 0.68694(6) 0.82151(3) 0.0457(2) Uani 1 1 d . . . 
O1 O 0.1902(5) 0.8049(2) 0.67737(11) 0.0732(8) Uani 1 1 d . . . 
C1 C 0.0656(5) 0.5959(3) 0.88578(13) 0.0428(7) Uani 1 1 d . . . 
N1 N -0.1646(3) 0.5265(2) 0.78640(11) 0.0384(5) Uani 1 1 d . . . 
S2 S 0.16850(11) 0.68911(7) 0.66751(3) 0.04443(19) Uani 1 1 d . . . 
N2 N -0.0613(4) 0.50126(19) 0.66222(11) 0.0396(5) Uani 1 1 d . . . 
O2 O 0.3498(3) 0.6355(3) 0.64843(12) 0.0773(9) Uani 1 1 d . . . 
C2 C -0.0544(5) 0.5020(3) 0.85294(14) 0.0439(7) Uani 1 1 d . . . 
H2A H 0.0390 0.4432 0.8491 0.053 Uiso 1 1 calc R . . 
H2B H -0.1530 0.4786 0.8811 0.053 Uiso 1 1 calc R . . 
C3 C -0.2360(6) 0.4272(3) 0.74984(17) 0.0552(8) Uani 1 1 d . . . 
H3A H -0.3665 0.4046 0.7620 0.066 Uiso 1 1 calc R . . 
H3B H -0.1380 0.3700 0.7603 0.066 Uiso 1 1 calc R . . 
C4 C -0.2570(5) 0.4529(3) 0.67708(16) 0.0538(8) Uani 1 1 d . . . 
H4A H -0.3687 0.5027 0.6656 0.065 Uiso 1 1 calc R . . 
H4B H -0.2860 0.3883 0.6514 0.065 Uiso 1 1 calc R . . 
C5 C -0.0799(6) 0.5514(3) 0.59480(14) 0.0532(8) Uani 1 1 d . . . 
H5A H -0.2184 0.5413 0.5732 0.064 Uiso 1 1 calc R . . 
H5B H 0.0111 0.5144 0.5689 0.064 Uiso 1 1 calc R . . 
C6 C -0.0299(4) 0.6701(2) 0.59564(13) 0.0379(6) Uani 1 1 d . . . 
C7 C -0.0511(7) 0.6601(3) 0.93293(18) 0.0737(12) Uani 1 1 d . . . 
H7A H -0.0898 0.6135 0.9664 0.111 Uiso 1 1 calc R . . 
H7B H -0.1713 0.6909 0.9087 0.111 Uiso 1 1 calc R . . 
H7C H 0.0351 0.7159 0.9532 0.111 Uiso 1 1 calc R . . 
C8 C 0.2614(6) 0.5519(4) 0.92548(17) 0.0664(10) Uani 1 1 d . . . 
H8A H 0.2262 0.5054 0.9595 0.100 Uiso 1 1 calc R . . 
H8B H 0.3427 0.6101 0.9450 0.100 Uiso 1 1 calc R . . 
H8C H 0.3379 0.5127 0.8967 0.100 Uiso 1 1 calc R . . 
C9 C -0.3444(5) 0.5969(3) 0.79046(17) 0.0599(9) Uani 1 1 d . . . 
H9A H -0.4336 0.5639 0.8179 0.090 Uiso 1 1 calc R . . 
H9B H -0.4167 0.6077 0.7471 0.090 Uiso 1 1 calc R . . 
H9C H -0.2988 0.6646 0.8090 0.090 Uiso 1 1 calc R . . 
C10 C 0.0991(6) 0.4172(3) 0.66701(18) 0.0640(10) Uani 1 1 d . . . 
H10A H 0.0555 0.3601 0.6371 0.096 Uiso 1 1 calc R . . 
H10B H 0.1216 0.3899 0.7112 0.096 Uiso 1 1 calc R . . 
H10C H 0.2238 0.4472 0.6559 0.096 Uiso 1 1 calc R . . 
C11 C -0.2117(6) 0.7380(3) 0.60658(18) 0.0619(9) Uani 1 1 d . . . 
H11A H -0.3209 0.7260 0.5715 0.093 Uiso 1 1 calc R . . 
H11B H -0.1735 0.8120 0.6074 0.093 Uiso 1 1 calc R . . 
H11C H -0.2562 0.7190 0.6478 0.093 Uiso 1 1 calc R . . 
C12 C 0.0573(6) 0.7035(4) 0.53317(15) 0.0645(10) Uani 1 1 d . . . 
H12A H -0.0396 0.6871 0.4953 0.097 Uiso 1 1 calc R . . 
H12B H 0.1821 0.6654 0.5305 0.097 Uiso 1 1 calc R . . 
H12C H 0.0840 0.7789 0.5345 0.097 Uiso 1 1 calc R . . 
  
loop_ 
 _atom_site_aniso_label 
 _atom_site_aniso_U_11 
 _atom_site_aniso_U_22 
 _atom_site_aniso_U_33 
 _atom_site_aniso_U_23 
 _atom_site_aniso_U_13 
 _atom_site_aniso_U_12 
Ni 0.02921(17) 0.02380(17) 0.03808(18) 0.00038(13) 0.00508(12) -0.00350(14) 
S1 0.0595(5) 0.0345(4) 0.0432(4) -0.0024(3) 0.0074(3) -0.0205(4) 
O1 0.100(2) 0.0557(16) 0.0616(14) 0.0091(12) 0.0029(13) -0.0451(17) 
C1 0.0534(16) 0.0376(16) 0.0384(14) 0.0034(12) 0.0102(12) -0.0073(15) 
N1 0.0332(11) 0.0339(12) 0.0489(13) 0.0007(10) 0.0085(9) -0.0076(11) 
S2 0.0387(4) 0.0522(5) 0.0423(4) 0.0086(3) 0.0051(3) -0.0123(4) 
N2 0.0458(13) 0.0260(12) 0.0454(12) -0.0014(10) 0.0005(10) 0.0068(11) 
O2 0.0331(11) 0.126(3) 0.0755(16) 0.0275(17) 0.0171(10) 0.0108(15) 
C2 0.0490(16) 0.0344(15) 0.0499(16) 0.0079(13) 0.0128(12) -0.0072(14) 
C3 0.063(2) 0.0386(17) 0.0637(19) 0.0014(15) 0.0061(15) -0.0248(17) 
C4 0.0554(18) 0.0375(18) 0.065(2) -0.0067(14) -0.0067(15) -0.0165(16) 
C5 0.073(2) 0.0416(18) 0.0415(16) -0.0009(13) -0.0043(14) 0.0007(18) 
C6 0.0411(14) 0.0345(15) 0.0380(13) 0.0043(11) 0.0047(11) 0.0050(13) 
C7 0.109(3) 0.063(3) 0.056(2) -0.0105(18) 0.036(2) -0.008(3) 
C8 0.066(2) 0.069(3) 0.059(2) 0.0142(18) -0.0085(16) -0.012(2) 
C9 0.0377(15) 0.077(3) 0.067(2) 0.0021(19) 0.0136(14) 0.0099(18) 
C10 0.078(2) 0.042(2) 0.070(2) -0.0032(16) 0.0055(18) 0.032(2) 
C11 0.059(2) 0.056(2) 0.070(2) 0.0017(18) 0.0059(16) 0.023(2) 
C12 0.079(2) 0.075(3) 0.0421(16) 0.0086(17) 0.0141(15) 0.005(2) 
  
_geom_special_details 
; 
 
; 
  
loop_ 
 _geom_bond_atom_site_label_1 
 _geom_bond_atom_site_label_2 
 _geom_bond_distance 
 _geom_bond_site_symmetry_2 
 _geom_bond_publ_flag 
Ni N1 1.945(2) . no
Ni N2 1.959(2) . no
Ni S2 2.1152(9) . no
Ni S1 2.1339(9) . no
S1 C1 1.851(3) . no
O1 S2 1.468(3) . no
C1 C7 1.539(5) . no
C1 C2 1.523(4) . no
C1 C8 1.535(5) . no
N1 C2 1.489(4) . no
N1 C3 1.495(4) . no
N1 C9 1.490(4) . no
S2 O2 1.470(3) . no
S2 C6 1.852(3) . no
N2 C10 1.487(4) . no
N2 C5 1.507(4) . no
N2 C4 1.494(4) . no
C2 H2A 0.9700 . no
C2 H2B 0.9700 . no
C3 C4 1.513(5) . no
C3 H3A 0.9700 . no
C3 H3B 0.9700 . no
C4 H4A 0.9700 . no
C4 H4B 0.9700 . no
C5 C6 1.521(5) . no
C5 H5A 0.9700 . no
C5 H5B 0.9700 . no
C6 C11 1.512(4) . no
C6 C12 1.529(4) . no
C7 H7A 0.9600 . no
C7 H7B 0.9600 . no
C7 H7C 0.9600 . no
C8 H8A 0.9600 . no
C8 H8B 0.9600 . no
C8 H8C 0.9600 . no
C9 H9A 0.9600 . no
C9 H9B 0.9600 . no
C9 H9C 0.9600 . no
C10 H10A 0.9600 . no
C10 H10B 0.9600 . no
C10 H10C 0.9600 . no
C11 H11A 0.9600 . no
C11 H11B 0.9600 . no
C11 H11C 0.9600 . no
C12 H12A 0.9600 . no
C12 H12B 0.9600 . no
C12 H12C 0.9600 . no
  
loop_ 
 _geom_angle_atom_site_label_1 
 _geom_angle_atom_site_label_2 
 _geom_angle_atom_site_label_3 
 _geom_angle 
 _geom_angle_site_symmetry_1 
 _geom_angle_site_symmetry_3 
 _geom_angle_publ_flag 
N1 Ni N2 89.06(10) . . no
N1 Ni S2 168.94(8) . . no
N2 Ni S2 86.46(8) . . no
N1 Ni S1 88.82(7) . . no
N2 Ni S1 170.62(7) . . no
S2 Ni S1 97.19(3) . . no
C1 S1 Ni 100.16(10) . . no
C7 C1 C2 113.9(3) . . no
C7 C1 C8 108.2(3) . . no
C2 C1 C8 108.0(3) . . no
C7 C1 S1 108.9(2) . . no
C2 C1 S1 109.22(19) . . no
C8 C1 S1 108.5(2) . . no
C2 N1 C3 111.8(2) . . no
C2 N1 C9 111.5(2) . . no
C3 N1 C9 108.6(3) . . no
C2 N1 Ni 109.12(17) . . no
C3 N1 Ni 107.62(18) . . no
C9 N1 Ni 108.1(2) . . no
O1 S2 O2 114.79(19) . . no
O1 S2 C6 106.40(15) . . no
O2 S2 C6 104.19(14) . . no
O1 S2 Ni 118.33(11) . . no
O2 S2 Ni 113.49(13) . . no
C6 S2 Ni 96.42(9) . . no
C10 N2 C5 109.0(2) . . no
C10 N2 C4 109.1(3) . . no
C5 N2 C4 112.8(2) . . no
C10 N2 Ni 106.0(2) . . no
C5 N2 Ni 114.56(19) . . no
C4 N2 Ni 104.94(18) . . no
N1 C2 C1 114.1(2) . . no
N1 C2 H2A 108.7 . . no
C1 C2 H2A 108.7 . . no
N1 C2 H2B 108.7 . . no
C1 C2 H2B 108.7 . . no
H2A C2 H2B 107.6 . . no
N1 C3 C4 107.3(3) . . no
N1 C3 H3A 110.2 . . no
C4 C3 H3A 110.2 . . no
N1 C3 H3B 110.2 . . no
C4 C3 H3B 110.2 . . no
H3A C3 H3B 108.5 . . no
C3 C4 N2 108.6(3) . . no
C3 C4 H4A 110.0 . . no
N2 C4 H4A 110.0 . . no
C3 C4 H4B 110.0 . . no
N2 C4 H4B 110.0 . . no
H4A C4 H4B 108.4 . . no
N2 C5 C6 113.9(2) . . no
N2 C5 H5A 108.8 . . no
C6 C5 H5A 108.8 . . no
N2 C5 H5B 108.8 . . no
C6 C5 H5B 108.8 . . no
H5A C5 H5B 107.7 . . no
C11 C6 C5 112.0(3) . . no
C11 C6 C12 111.4(3) . . no
C5 C6 C12 111.3(3) . . no
C11 C6 S2 107.6(2) . . no
C5 C6 S2 105.3(2) . . no
C12 C6 S2 108.9(2) . . no
C1 C7 H7A 109.5 . . no
C1 C7 H7B 109.5 . . no
H7A C7 H7B 109.5 . . no
C1 C7 H7C 109.5 . . no
H7A C7 H7C 109.5 . . no
H7B C7 H7C 109.5 . . no
C1 C8 H8A 109.5 . . no
C1 C8 H8B 109.5 . . no
H8A C8 H8B 109.5 . . no
C1 C8 H8C 109.5 . . no
H8A C8 H8C 109.5 . . no
H8B C8 H8C 109.5 . . no
N1 C9 H9A 109.5 . . no
N1 C9 H9B 109.5 . . no
H9A C9 H9B 109.5 . . no
N1 C9 H9C 109.5 . . no
H9A C9 H9C 109.5 . . no
H9B C9 H9C 109.5 . . no
N2 C10 H10A 109.5 . . no
N2 C10 H10B 109.5 . . no
H10A C10 H10B 109.5 . . no
N2 C10 H10C 109.5 . . no
H10A C10 H10C 109.5 . . no
H10B C10 H10C 109.5 . . no
C6 C11 H11A 109.5 . . no
C6 C11 H11B 109.5 . . no
H11A C11 H11B 109.5 . . no
C6 C11 H11C 109.5 . . no
H11A C11 H11C 109.5 . . no
H11B C11 H11C 109.5 . . no
C6 C12 H12A 109.5 . . no
C6 C12 H12B 109.5 . . no
H12A C12 H12B 109.5 . . no
C6 C12 H12C 109.5 . . no
H12A C12 H12C 109.5 . . no
H12B C12 H12C 109.5 . . no
  
_diffrn_measured_fraction_theta_max    0.998 
_diffrn_reflns_theta_full              27.46 
_diffrn_measured_fraction_theta_full   0.998 
_refine_diff_density_max    0.892 
_refine_diff_density_min   -0.468 
_refine_diff_density_rms    0.081 

#===END

data_3 
_audit_creation_date             'May 21, 2002' 
_audit_creation_method            SHELXL-97 
_audit_update_record
;
  June_21_2002 text and data added by Mark S. Mashuta
  Oct_6_2003 text and data added by Mark S. Mashuta
;
_chemical_name_systematic 
; 
 [(bmmp-TASN)Zn] 
; 
_chemical_name_common              [(bmmp-TASN)Zn] 
_chemical_melting_point           ? 
_chemical_formula_moiety          'C12 H26 N2 S2 Zn' 
_chemical_formula_sum             'C12 H26 N2 S2 Zn' 
_chemical_formula_weight          327.84 
  
loop_ 
 _atom_type_symbol 
 _atom_type_description 
 _atom_type_scat_dispersion_real 
 _atom_type_scat_dispersion_imag 
 _atom_type_scat_source 
 'C'  'C'   0.0033   0.0016 
 'International Tables Vol C Tables 4.2.6.8 and 6.1.1.4' 
 'H'  'H'   0.0000   0.0000 
 'International Tables Vol C Tables 4.2.6.8 and 6.1.1.4' 
 'N'  'N'   0.0061   0.0033 
 'International Tables Vol C Tables 4.2.6.8 and 6.1.1.4' 
 'S'  'S'   0.1246   0.1234 
 'International Tables Vol C Tables 4.2.6.8 and 6.1.1.4' 
 'Zn'  'Zn'   0.2839   1.4301 
 'International Tables Vol C Tables 4.2.6.8 and 6.1.1.4' 
  
_symmetry_cell_setting            Orthorhombic 
_symmetry_space_group_name_H-M    Pbcn 
_symmetry_space_group_name_Hall    '-P 2n 2ab'    
  
loop_ 
 _symmetry_equiv_pos_as_xyz 
 'x, y, z' 
 '-x+1/2, -y+1/2, z+1/2' 
 '-x, y, -z+1/2' 
 'x+1/2, -y+1/2, -z' 
 '-x, -y, -z' 
 'x-1/2, y-1/2, -z-1/2' 
 'x, -y, z-1/2' 
 '-x-1/2, y-1/2, z' 
  
_cell_length_a                    7.083(3) 
_cell_length_b                    11.497(4) 
_cell_length_c                    20.830(7) 
_cell_angle_alpha                 90.00 
_cell_angle_beta                  90.00 
_cell_angle_gamma                 90.00 
_cell_volume                      1696.3(10) 
_cell_formula_units_Z             4 
_cell_measurement_temperature     100(2) 
_cell_measurement_reflns_used     1329 
_cell_measurement_theta_min       3.38 
_cell_measurement_theta_max       18.85 
  
_exptl_crystal_description        plate 
_exptl_crystal_colour             colorless 
_exptl_crystal_size_max           0.23 
_exptl_crystal_size_mid           0.14 
_exptl_crystal_size_min           0.06 
_exptl_crystal_density_meas       'not measured'
_exptl_crystal_density_diffrn     1.284 
_exptl_crystal_density_method     'not measured' 
_exptl_crystal_F_000              696 
_exptl_absorpt_coefficient_mu     1.678 
_exptl_absorpt_correction_type    'multi-scan'
_exptl_absorpt_correction_T_min   0.753
_exptl_absorpt_correction_T_max   0.904
_exptl_absorpt_process_details 

;
Sheldrick, G. M.; SADABS (1996).
;
  
_diffrn_ambient_temperature       100(2) 
_diffrn_radiation_wavelength      0.71073 
_diffrn_radiation_type            MoK\a 
_diffrn_radiation_source          'normal-focus sealed tube' 
_diffrn_radiation_monochromator   graphite 
_diffrn_measurement_device_type   'SMART APEX CCD' 
_diffrn_measurement_method        '\w scans' 
_diffrn_detector_area_resol_mean  ? 
_diffrn_standards_number          0 
_diffrn_standards_interval_count  0 
_diffrn_standards_interval_time   0 
_diffrn_standards_decay_%         0 
_diffrn_reflns_number             12545 
_diffrn_reflns_av_R_equivalents   0.0616 
_diffrn_reflns_av_sigmaI/netI     0.0632 
_diffrn_reflns_limit_h_min        -8 
_diffrn_reflns_limit_h_max        8 
_diffrn_reflns_limit_k_min        -14 
_diffrn_reflns_limit_k_max        14 
_diffrn_reflns_limit_l_min        -26 
_diffrn_reflns_limit_l_max        26 
_diffrn_reflns_theta_min          1.96 
_diffrn_reflns_theta_max          27.39 
_reflns_number_total              1830 
_reflns_number_gt                 787 
_reflns_threshold_expression      >2sigma(I) 
  
_computing_data_collection        'SMART 5.624 (Bruker, 1994)' 
_computing_cell_refinement        'SAINT 6.2 (Bruker, 1994)' 
_computing_data_reduction         'SAINT 6.2 (Bruker, 1994)'
_computing_structure_solution     'SHELXS-97 (Sheldrick, 1990)' 
_computing_structure_refinement   'SHELXL-97 (Sheldrick, 1997)' 
_computing_molecular_graphics     'SHELXTL 6.12 (Bruker, 2001)'
_computing_publication_material   'SHELXTL 6.12 (Bruker, 2001)'
  
_refine_special_details
; 
 Refinement of F^2^ against ALL reflections.  The weighted R-factor
 wR and goodness of fit S are based on F^2^.
; 
  
_refine_ls_structure_factor_coef  Fsqd 
_refine_ls_matrix_type            full 
_refine_ls_weighting_scheme       calc 
_refine_ls_weighting_details 
 'calc w=1/[\s^2^(Fo^2^)+(0.0296P)^2^+0.0000P] where P=(Fo^2^+2Fc^2^)/3' 
_atom_sites_solution_primary      direct 
_atom_sites_solution_secondary    difmap 
_atom_sites_solution_hydrogens    geom 
_refine_ls_hydrogen_treatment     constr 
_refine_ls_extinction_method      none 
_refine_ls_extinction_coef        ? 
_refine_ls_number_reflns          1830 
_refine_ls_number_parameters      81 
_refine_ls_number_restraints      0 
_refine_ls_R_factor_all           0.143 
_refine_ls_R_factor_gt            0.043 
_refine_ls_wR_factor_ref          0.088 
_refine_ls_wR_factor_gt           0.079 
_refine_ls_goodness_of_fit_ref    1.01 
_refine_ls_restrained_S_all       1.01 
_refine_ls_shift/su_max           0.001 
_refine_ls_shift/su_mean          0.001 
  
loop_ 
 _atom_site_label 
 _atom_site_type_symbol 
 _atom_site_fract_x 
 _atom_site_fract_y 
 _atom_site_fract_z 
 _atom_site_U_iso_or_equiv 
 _atom_site_adp_type 
 _atom_site_occupancy 
 _atom_site_symmetry_multiplicity 
 _atom_site_calc_flag 
 _atom_site_refinement_flags 
 _atom_site_disorder_assembly 
 _atom_site_disorder_group 
Zn1 Zn 0.5000 0.35315(4) 0.7500 0.0556(3) Uani 1 2 d S . . 
S1 S 0.69468(19) 0.29343(10) 0.67215(5) 0.0951(5) Uani 1 1 d . . . 
N1 N 0.3903(4) 0.4876(2) 0.69036(13) 0.0487(8) Uani 1 1 d . . . 
C1 C 0.5887(6) 0.3789(3) 0.60714(19) 0.0691(12) Uani 1 1 d . . . 
C2 C 0.5136(5) 0.4946(3) 0.63290(16) 0.0575(10) Uani 1 1 d . . . 
H2A H 0.6228 0.5449 0.6434 0.069 Uiso 1 1 calc R . . 
H2B H 0.4421 0.5334 0.5981 0.069 Uiso 1 1 calc R . . 
C3 C 0.4122(5) 0.5917(3) 0.73100(17) 0.0711(14) Uani 1 1 d . . . 
H3A H 0.4104 0.6616 0.7033 0.085 Uiso 1 1 calc R . . 
H3B H 0.3032 0.5968 0.7606 0.085 Uiso 1 1 calc R . . 
C4 C 0.4424(7) 0.3048(3) 0.5734(2) 0.126(2) Uani 1 1 d . . . 
H4A H 0.3415 0.2848 0.6037 0.189 Uiso 1 1 calc R . . 
H4B H 0.5018 0.2334 0.5576 0.189 Uiso 1 1 calc R . . 
H4C H 0.3891 0.3483 0.5372 0.189 Uiso 1 1 calc R . . 
C5 C 0.7442(7) 0.4076(4) 0.55879(19) 0.1201(19) Uani 1 1 d . . . 
H5A H 0.7929 0.3355 0.5400 0.180 Uiso 1 1 calc R . . 
H5B H 0.8469 0.4488 0.5806 0.180 Uiso 1 1 calc R . . 
H5C H 0.6925 0.4571 0.5247 0.180 Uiso 1 1 calc R . . 
C6 C 0.1900(6) 0.4729(4) 0.6719(2) 0.1006(16) Uani 1 1 d . . . 
H6A H 0.1497 0.5395 0.6460 0.151 Uiso 1 1 calc R . . 
H6B H 0.1119 0.4681 0.7107 0.151 Uiso 1 1 calc R . . 
H6C H 0.1757 0.4012 0.6469 0.151 Uiso 1 1 calc R . . 
  
loop_ 
 _atom_site_aniso_label 
 _atom_site_aniso_U_11 
 _atom_site_aniso_U_22 
 _atom_site_aniso_U_33 
 _atom_site_aniso_U_23 
 _atom_site_aniso_U_13 
 _atom_site_aniso_U_12 
Zn1 0.0820(5) 0.0312(3) 0.0538(4) 0.000 -0.0125(4) 0.000 
S1 0.1380(11) 0.0819(8) 0.0654(7) -0.0055(6) -0.0098(8) 0.0669(8) 
N1 0.046(2) 0.0434(17) 0.056(2) 0.0083(15) 0.0012(17) 0.0075(15) 
C1 0.093(3) 0.058(3) 0.056(3) -0.007(2) -0.012(3) 0.030(2) 
C2 0.075(3) 0.047(2) 0.050(2) 0.0055(17) 0.000(2) 0.007(2) 
C3 0.111(4) 0.0360(19) 0.066(3) 0.002(2) 0.007(2) 0.024(2) 
C4 0.201(6) 0.063(3) 0.113(4) -0.025(3) -0.073(4) 0.015(3) 
C5 0.142(5) 0.151(5) 0.067(3) -0.003(3) 0.027(3) 0.057(4) 
C6 0.053(3) 0.138(4) 0.111(4) 0.024(3) -0.019(3) 0.012(3) 
  
_geom_special_details 
; 
 
; 
  
loop_ 
 _geom_bond_atom_site_label_1 
 _geom_bond_atom_site_label_2 
 _geom_bond_distance 
 _geom_bond_site_symmetry_2 
 _geom_bond_publ_flag 
Zn1 N1 2.130(3) 3_656 ?
Zn1 N1 2.130(3) . no 
Zn1 S1 2.2367(13) 3_656 ? 
Zn1 S1 2.2367(13) . no 
S1 C1 1.834(4) . no 
N1 C3 1.474(4) . no 
N1 C6 1.480(4) . no 
N1 C2 1.484(4) . no 
C1 C4 1.514(5) . no 
C1 C5 1.529(5) . no 
C1 C2 1.530(4) . no 
C2 H2A 0.9900 . no 
C2 H2B 0.9900 . no 
C3 C3 1.474(7) 3_656 ? 
C3 H3A 0.9900 . no 
C3 H3B 0.9900 . no 
C4 H4A 0.9800 . no 
C4 H4B 0.9800 . no 
C4 H4C 0.9800 . no 
C5 H5A 0.9800 . no 
C5 H5B 0.9800 . no 
C5 H5C 0.9800 . no 
C6 H6A 0.9800 . no 
C6 H6B 0.9800 . no 
C6 H6C 0.9800 . no 
  
loop_ 
 _geom_angle_atom_site_label_1 
 _geom_angle_atom_site_label_2 
 _geom_angle_atom_site_label_3 
 _geom_angle 
 _geom_angle_site_symmetry_1 
 _geom_angle_site_symmetry_3 
 _geom_angle_publ_flag 
N1 Zn1 N1 86.94(16) 3_656 . no 
N1 Zn1 S1 91.42(9) 3_656 3_656 ? 
N1 Zn1 S1 114.89(9) . 3_656 ? 
N1 Zn1 S1 114.89(9) 3_656 . no 
N1 Zn1 S1 91.42(9) . . no 
S1 Zn1 S1 144.24(7) 3_656 . no 
C1 S1 Zn1 96.80(14) . . no 
C3 N1 C6 110.1(3) . . no 
C3 N1 C2 110.9(3) . . no 
C6 N1 C2 111.2(3) . . no 
C3 N1 Zn1 102.5(2) . . no 
C6 N1 Zn1 114.7(2) . . no 
C2 N1 Zn1 107.19(19) . . no 
C4 C1 C5 108.0(4) . . no 
C4 C1 C2 114.4(3) . . no 
C5 C1 C2 107.0(3) . . no 
C4 C1 S1 108.8(3) . . no 
C5 C1 S1 107.9(3) . . no 
C2 C1 S1 110.5(3) . . no 
N1 C2 C1 116.1(3) . . no 
N1 C2 H2A 108.3 . . no 
C1 C2 H2A 108.3 . . no 
N1 C2 H2B 108.3 . . no 
C1 C2 H2B 108.3 . . no 
H2A C2 H2B 107.4 . . no 
C3 C3 N1 113.4(3) 3_656 . no 
C3 C3 H3A 108.9 3_656 . no 
N1 C3 H3A 108.9 . . no 
C3 C3 H3B 108.9 3_656 . no 
N1 C3 H3B 108.9 . . no 
H3A C3 H3B 107.7 . . no 
C1 C4 H4A 109.5 . . no 
C1 C4 H4B 109.5 . . no 
H4A C4 H4B 109.5 . . no 
C1 C4 H4C 109.5 . . no 
H4A C4 H4C 109.5 . . no 
H4B C4 H4C 109.5 . . no 
C1 C5 H5A 109.5 . . no 
C1 C5 H5B 109.5 . . no 
H5A C5 H5B 109.5 . . no 
C1 C5 H5C 109.5 . . no 
H5A C5 H5C 109.5 . . no 
H5B C5 H5C 109.5 . . no 
N1 C6 H6A 109.5 . . no 
N1 C6 H6B 109.5 . . no 
H6A C6 H6B 109.5 . . no 
N1 C6 H6C 109.5 . . no 
H6A C6 H6C 109.5 . . no 
H6B C6 H6C 109.5 . . no 
  
_diffrn_measured_fraction_theta_max    0.950 
_diffrn_reflns_theta_full              27.39 
_diffrn_measured_fraction_theta_full   0.950 
_refine_diff_density_max    0.324 
_refine_diff_density_min   -0.279 
_refine_diff_density_rms    0.061 

#===END

data_4 
_audit_creation_date             'March 18, 2002' 
_audit_creation_method            SHELXL-97 
_audit_update_record
;
  April_10_2002 text and data added by Mark S. Mashuta
  Oct_7_2003 text and data added by Mark S. Mashuta
;
_chemical_name_systematic 
; 
 [(bmmp-TASN)] 
; 
_chemical_name_common              [(bmmp-TASN)] 
_chemical_melting_point           ? 
_chemical_formula_moiety        'C12 H28 N2 O6 S2'
_chemical_formula_sum           'C12 H28 N2 O6 S2' 
_chemical_formula_weight          360.48 
  
loop_ 
 _atom_type_symbol 
 _atom_type_description 
 _atom_type_scat_dispersion_real 
 _atom_type_scat_dispersion_imag 
 _atom_type_scat_source 
 'C'  'C'   0.0033   0.0016 
 'International Tables Vol C Tables 4.2.6.8 and 6.1.1.4' 
 'H'  'H'   0.0000   0.0000 
 'International Tables Vol C Tables 4.2.6.8 and 6.1.1.4' 
 'N'  'N'   0.0061   0.0033 
 'International Tables Vol C Tables 4.2.6.8 and 6.1.1.4' 
 'O'  'O'   0.0106   0.0060 
 'International Tables Vol C Tables 4.2.6.8 and 6.1.1.4' 
 'S'  'S'   0.1246   0.1234 
 'International Tables Vol C Tables 4.2.6.8 and 6.1.1.4' 
  
_symmetry_cell_setting            Monoclinic 
_symmetry_space_group_name_H-M    'P 21/c' 
_symmetry_space_group_name_Hall    '-P 2ybc' 
  
  
loop_ 
 _symmetry_equiv_pos_as_xyz 
 'x, y, z' 
 '-x, y+1/2, -z+1/2' 
 '-x, -y, -z' 
 'x, -y-1/2, z-1/2' 
  
_cell_length_a                    11.5838(11) 
_cell_length_b                    12.4871(12) 
_cell_length_c                    12.0844(12) 
_cell_angle_alpha                 90.00 
_cell_angle_beta                  98.660(2) 
_cell_angle_gamma                 90.00 
_cell_volume                      1728.1(3) 
_cell_formula_units_Z             4 
_cell_measurement_temperature     293(2) 
_cell_measurement_reflns_used     4692 
_cell_measurement_theta_min       2.36 
_cell_measurement_theta_max       27.82 
  
_exptl_crystal_description        plate 
_exptl_crystal_colour             colorless 
_exptl_crystal_size_max           0.33 
_exptl_crystal_size_mid           0.21
_exptl_crystal_size_min           0.02
_exptl_crystal_density_meas       'not measured'
_exptl_crystal_density_diffrn     1.386 
_exptl_crystal_density_method     'not measured' 
_exptl_crystal_F_000              776 
_exptl_absorpt_coefficient_mu     0.336 
_exptl_absorpt_correction_type    'multi-scan'
_exptl_absorpt_correction_T_min   0.893
_exptl_absorpt_correction_T_max   0.992 
_exptl_absorpt_process_details 

;
Sheldrick, G. M.; SADABS (1996).
;

  
_diffrn_ambient_temperature       100(2) 
_diffrn_radiation_wavelength      0.71073 
_diffrn_radiation_type            MoK\a 
_diffrn_radiation_source          'normal-focus sealed tube' 
_diffrn_radiation_monochromator   graphite 
_diffrn_measurement_device_type   'SMART APEX CCD' 
_diffrn_measurement_method        '\w scans' 
_diffrn_detector_area_resol_mean  ? 
_diffrn_standards_number          0 
_diffrn_standards_interval_count  0 
_diffrn_standards_interval_time   0 
_diffrn_standards_decay_%         0 
_diffrn_reflns_number             14837 
_diffrn_reflns_av_R_equivalents   0.0445 
_diffrn_reflns_av_sigmaI/netI     0.0537 
_diffrn_reflns_limit_h_min        -16 
_diffrn_reflns_limit_h_max        16 
_diffrn_reflns_limit_k_min        -16 
_diffrn_reflns_limit_k_max        16 
_diffrn_reflns_limit_l_min        -15 
_diffrn_reflns_limit_l_max        14 
_diffrn_reflns_theta_min          1.78 
_diffrn_reflns_theta_max          29.47 
_reflns_number_total              4007 
_reflns_number_gt                 3095 
_reflns_threshold_expression      >2sigma(I) 
  
_computing_data_collection        'SMART 5.624 (Bruker, 1994)' 
_computing_cell_refinement        'SAINT 6.2 (Bruker, 1994)' 
_computing_data_reduction         'SAINT 6.2 (Bruker, 1994)'
_computing_structure_solution     'SHELXS-97 (Sheldrick, 1990)' 
_computing_structure_refinement   'SHELXL-97 (Sheldrick, 1997)' 
_computing_molecular_graphics     'SHELXTL 6.12 (Bruker, 2001)'
_computing_publication_material   'SHELXTL 6.12 (Bruker, 2001)'
  
  
_refine_special_details
; 
 Refinement of F^2^ against ALL reflections.  The weighted R-factor
 wR and goodness of fit S are based on F^2^.
; 
  
_refine_ls_structure_factor_coef  Fsqd 
_refine_ls_matrix_type            full 
_refine_ls_weighting_scheme       calc 
_refine_ls_weighting_details 
 'calc w=1/[\s^2^(Fo^2^)+(0.0290P)^2^+0.8784P] where P=(Fo^2^+2Fc^2^)/3' 
_atom_sites_solution_primary      direct 
_atom_sites_solution_secondary    difmap 
_atom_sites_solution_hydrogens    geom 
_refine_ls_hydrogen_treatment     mixed 
_refine_ls_extinction_method      none 
_refine_ls_extinction_coef        ? 
_refine_ls_number_reflns          4007 
_refine_ls_number_parameters      312 
_refine_ls_number_restraints      0 
_refine_ls_R_factor_all           0.0556 
_refine_ls_R_factor_gt            0.0369 
_refine_ls_wR_factor_ref          0.0861 
_refine_ls_wR_factor_gt           0.0807 
_refine_ls_goodness_of_fit_ref    1.039 
_refine_ls_restrained_S_all       1.039 
_refine_ls_shift/su_max           0.001 
_refine_ls_shift/su_mean          0.001 
  
loop_ 
 _atom_site_label 
 _atom_site_type_symbol 
 _atom_site_fract_x 
 _atom_site_fract_y 
 _atom_site_fract_z 
 _atom_site_U_iso_or_equiv 
 _atom_site_adp_type 
 _atom_site_occupancy 
 _atom_site_symmetry_multiplicity 
 _atom_site_calc_flag 
 _atom_site_refinement_flags 
 _atom_site_disorder_assembly 
 _atom_site_disorder_group 
S1 S 0.56671(4) 0.80587(3) 0.71630(4) 0.01402(12) Uani 1 1 d . . . 
S2 S 0.99138(4) 0.60983(4) 0.78876(4) 0.01417(12) Uani 1 1 d . . . 
O1 O 0.51927(11) 0.85588(10) 0.60672(11) 0.0193(3) Uani 1 1 d . . . 
O2 O 0.54031(11) 0.86087(10) 0.81923(11) 0.0189(3) Uani 1 1 d . . . 
O3 O 0.68754(10) 0.78564(10) 0.72349(11) 0.0163(3) Uani 1 1 d . . . 
O4 O 0.87908(10) 0.64723(10) 0.73633(11) 0.0170(3) Uani 1 1 d . . . 
O5 O 0.98579(11) 0.51677(10) 0.86283(11) 0.0206(3) Uani 1 1 d . . . 
O6 O 1.06631(11) 0.59832(11) 0.70265(11) 0.0209(3) Uani 1 1 d . . . 
N1 N 0.68088(12) 0.58858(12) 0.83621(13) 0.0141(3) Uani 1 1 d . . . 
H1N H 0.7058(16) 0.6275(15) 0.7889(16) 0.008(5) Uiso 1 1 d . . . 
N2 N 0.85240(13) 0.77931(12) 0.92636(14) 0.0134(3) Uani 1 1 d . . . 
H2N H 0.8397(16) 0.7656(15) 0.8525(18) 0.011(5) Uiso 1 1 d . . . 
C1 C 0.50560(15) 0.67265(14) 0.71740(15) 0.0161(4) Uani 1 1 d . . . 
C2 C 0.55774(15) 0.61552(15) 0.83006(16) 0.0151(4) Uani 1 1 d . . . 
H2A H 0.5203(16) 0.5499(16) 0.8375(15) 0.009(5) Uiso 1 1 d . . . 
H2B H 0.5499(16) 0.6569(16) 0.8978(17) 0.014(5) Uiso 1 1 d . . . 
C3 C 0.74555(16) 0.60934(15) 0.95597(16) 0.0161(4) Uani 1 1 d . . . 
H3A H 0.7033(17) 0.5790(15) 1.0123(16) 0.014(5) Uiso 1 1 d . . . 
H3B H 0.8139(18) 0.5746(15) 0.9597(15) 0.012(5) Uiso 1 1 d . . . 
C4 C 0.76263(16) 0.72669(15) 0.98457(17) 0.0154(4) Uani 1 1 d . . . 
H4A H 0.7871(15) 0.7348(14) 1.0648(17) 0.007(4) Uiso 1 1 d . . . 
H4B H 0.6974(17) 0.7678(15) 0.9594(16) 0.012(5) Uiso 1 1 d . . . 
C5 C 0.96764(15) 0.73809(15) 0.97549(16) 0.0146(4) Uani 1 1 d . . . 
H5A H 1.0017(16) 0.7894(16) 1.0296(16) 0.010(5) Uiso 1 1 d . . . 
H5B H 0.9569(17) 0.6712(17) 1.0182(16) 0.018(5) Uiso 1 1 d . . . 
C6 C 1.04613(15) 0.71888(14) 0.88492(15) 0.0150(4) Uani 1 1 d . . . 
C7 C 0.38056(17) 0.68458(18) 0.7245(2) 0.0255(5) Uani 1 1 d . . . 
H7A H 0.3445(19) 0.6129(19) 0.7251(18) 0.026(6) Uiso 1 1 d . . . 
H7B H 0.3434(19) 0.7212(18) 0.6599(19) 0.026(6) Uiso 1 1 d . . . 
H7C H 0.368(2) 0.7201(19) 0.797(2) 0.034(6) Uiso 1 1 d . . . 
C8 C 0.5226(2) 0.61399(17) 0.60579(17) 0.0223(4) Uani 1 1 d . . . 
H8A H 0.4892(19) 0.6492(18) 0.5395(19) 0.025(6) Uiso 1 1 d . . . 
H8B H 0.4924(19) 0.540(2) 0.6088(18) 0.028(6) Uiso 1 1 d . . . 
H8C H 0.603(2) 0.6084(18) 0.5954(19) 0.030(6) Uiso 1 1 d . . . 
C9 C 1.15762(18) 0.68241(19) 0.9542(2) 0.0249(5) Uani 1 1 d . . . 
H9A H 1.188(2) 0.7381(19) 1.004(2) 0.031(6) Uiso 1 1 d . . . 
H9B H 1.1461(17) 0.6226(17) 1.0088(18) 0.020(5) Uiso 1 1 d . . . 
H9C H 1.203(2) 0.6634(19) 0.904(2) 0.034(7) Uiso 1 1 d . . . 
C10 C 1.06216(19) 0.81737(16) 0.81080(19) 0.0220(4) Uani 1 1 d . . . 
H10A H 1.114(2) 0.8015(17) 0.7580(19) 0.026(6) Uiso 1 1 d . . . 
H10B H 0.991(2) 0.8390(18) 0.7604(19) 0.027(6) Uiso 1 1 d . . . 
H10C H 1.0895(18) 0.8737(18) 0.8613(18) 0.025(6) Uiso 1 1 d . . . 
C11 C 0.69822(18) 0.47484(15) 0.80172(19) 0.0201(4) Uani 1 1 d . . . 
H11A H 0.6774(17) 0.4322(17) 0.8623(17) 0.018(5) Uiso 1 1 d . . . 
H11B H 0.6540(19) 0.4626(18) 0.7236(19) 0.029(6) Uiso 1 1 d . . . 
H11C H 0.777(2) 0.4662(18) 0.7982(18) 0.029(6) Uiso 1 1 d . . . 
C12 C 0.84268(18) 0.89864(15) 0.93855(18) 0.0198(4) Uani 1 1 d . . . 
H12A H 0.7712(18) 0.9200(16) 0.9036(16) 0.016(5) Uiso 1 1 d . . . 
H12B H 0.8531(16) 0.9134(15) 1.0224(18) 0.016(5) Uiso 1 1 d . . . 
H12C H 0.897(2) 0.9291(18) 0.9035(18) 0.028(6) Uiso 1 1 d . . . 
  
loop_ 
 _atom_site_aniso_label 
 _atom_site_aniso_U_11 
 _atom_site_aniso_U_22 
 _atom_site_aniso_U_33 
 _atom_site_aniso_U_23 
 _atom_site_aniso_U_13 
 _atom_site_aniso_U_12 
S1 0.0145(2) 0.0128(2) 0.0155(2) 0.00098(18) 0.00460(17) 0.00226(16) 
S2 0.0148(2) 0.0128(2) 0.0150(2) -0.00008(18) 0.00285(17) 0.00187(16) 
O1 0.0196(7) 0.0178(7) 0.0206(7) 0.0043(5) 0.0033(5) 0.0039(5) 
O2 0.0194(7) 0.0168(7) 0.0215(7) -0.0019(5) 0.0065(5) 0.0039(5) 
O3 0.0130(6) 0.0153(7) 0.0215(7) 0.0016(5) 0.0056(5) 0.0011(5) 
O4 0.0127(6) 0.0193(7) 0.0186(7) -0.0035(5) 0.0014(5) 0.0015(5) 
O5 0.0257(7) 0.0130(7) 0.0234(7) 0.0023(6) 0.0046(6) 0.0008(5) 
O6 0.0185(7) 0.0220(7) 0.0233(7) -0.0009(6) 0.0071(6) 0.0058(5) 
N1 0.0113(7) 0.0118(8) 0.0202(9) 0.0019(6) 0.0052(6) -0.0005(6) 
N2 0.0144(7) 0.0132(8) 0.0129(8) -0.0011(6) 0.0030(6) -0.0005(6) 
C1 0.0155(9) 0.0145(9) 0.0182(10) 0.0007(7) 0.0023(7) -0.0008(7) 
C2 0.0112(8) 0.0149(9) 0.0200(10) 0.0014(8) 0.0049(7) 0.0006(7) 
C3 0.0129(9) 0.0176(9) 0.0179(10) 0.0037(8) 0.0024(7) -0.0005(7) 
C4 0.0128(9) 0.0193(10) 0.0152(10) 0.0000(8) 0.0055(7) -0.0005(7) 
C5 0.0137(9) 0.0142(9) 0.0149(10) 0.0004(8) -0.0007(7) -0.0005(7) 
C6 0.0128(8) 0.0153(9) 0.0166(10) -0.0007(7) 0.0017(7) -0.0011(7) 
C7 0.0157(10) 0.0258(12) 0.0337(13) 0.0078(10) 0.0000(9) -0.0014(8) 
C8 0.0309(12) 0.0167(10) 0.0188(11) 0.0000(8) 0.0021(9) -0.0035(9) 
C9 0.0156(10) 0.0309(12) 0.0267(12) -0.0016(10) -0.0013(9) 0.0015(8) 
C10 0.0242(11) 0.0159(10) 0.0276(12) 0.0006(9) 0.0094(9) -0.0045(8) 
C11 0.0174(9) 0.0118(9) 0.0309(12) -0.0015(8) 0.0034(9) 0.0014(7) 
C12 0.0211(10) 0.0127(9) 0.0254(11) -0.0012(8) 0.0031(9) 0.0016(8) 
  
_geom_special_details 
; 

; 
  
loop_ 
 _geom_bond_atom_site_label_1 
 _geom_bond_atom_site_label_2 
 _geom_bond_distance 
 _geom_bond_site_symmetry_2 
 _geom_bond_publ_flag 
S1 O3 1.4120(12) . no 
S1 O2 1.4922(13) . no 
S1 O1 1.4922(13) . no 
S1 C1 1.8088(19) . no 
S2 O4 1.4365(13) . no 
S2 O6 1.4590(13) . no 
S2 O5 1.4742(13) . no 
S2 C6 1.8398(18) . no 
N1 C2 1.456(2) . no 
N1 C11 1.502(2) . no 
N1 C3 1.548(2) . no 
N1 H1N 0.83(2) . no 
N2 C5 1.470(2) . no 
N2 C4 1.493(2) . no 
N2 C12 1.503(2) . no 
N2 H2N 0.90(2) . no 
C1 C7 1.472(3) . no 
C1 C8 1.573(3) . no 
C1 C2 1.575(3) . no 
C2 H2A 0.94(2) . no 
C2 H2B 0.98(2) . no 
C3 C4 1.512(3) . no 
C3 H3A 0.97(2) . no 
C3 H3B 0.90(2) . no 
C4 H4A 0.973(19) . no 
C4 H4B 0.926(19) . no 
C5 C6 1.543(3) . no 
C5 H5A 0.96(2) . no 
C5 H5B 1.00(2) . no 
C6 C9 1.500(3) . no 
C6 C10 1.549(3) . no 
C7 H7A 0.99(2) . no 
C7 H7B 0.95(2) . no 
C7 H7C 1.01(2) . no 
C8 H8A 0.94(2) . no 
C8 H8B 0.98(2) . no 
C8 H8C 0.96(2) . no 
C9 H9A 0.95(2) . no 
C9 H9B 1.02(2) . no 
C9 H9C 0.90(3) . no 
C10 H10A 0.96(2) . no 
C10 H10B 0.99(2) . no 
C10 H10C 0.95(2) . no 
C11 H11A 0.97(2) . no 
C11 H11B 1.02(2) . no 
C11 H11C 0.93(2) . no 
C12 H12A 0.91(2) . no 
C12 H12B 1.02(2) . no 
C12 H12C 0.90(2) . no 
  
loop_ 
 _geom_angle_atom_site_label_1 
 _geom_angle_atom_site_label_2 
 _geom_angle_atom_site_label_3 
 _geom_angle 
 _geom_angle_site_symmetry_1 
 _geom_angle_site_symmetry_3 
 _geom_angle_publ_flag 
O3 S1 O2 110.90(8) . . no 
O3 S1 O1 111.02(8) . . no 
O2 S1 O1 116.92(7) . . no 
O3 S1 C1 102.73(8) . . no 
O2 S1 C1 106.72(8) . . no 
O1 S1 C1 107.41(8) . . no 
O4 S2 O6 108.30(8) . . no 
O4 S2 O5 113.85(8) . . no 
O6 S2 O5 116.15(8) . . no 
O4 S2 C6 103.95(8) . . no 
O6 S2 C6 109.75(8) . . no 
O5 S2 C6 104.03(8) . . no 
C2 N1 C11 112.03(15) . . no 
C2 N1 C3 109.96(14) . . no 
C11 N1 C3 110.58(15) . . no 
C2 N1 H1N 105.5(13) . . no 
C11 N1 H1N 106.6(13) . . no 
C3 N1 H1N 112.0(13) . . no 
C5 N2 C4 108.08(14) . . no 
C5 N2 C12 112.60(15) . . no 
C4 N2 C12 108.81(14) . . no 
C5 N2 H2N 109.7(12) . . no 
C4 N2 H2N 111.3(12) . . no 
C12 N2 H2N 106.4(12) . . no 
C7 C1 C8 110.43(17) . . no 
C7 C1 C2 104.36(16) . . no 
C8 C1 C2 116.68(15) . . no 
C7 C1 S1 107.28(13) . . no 
C8 C1 S1 108.79(13) . . no 
C2 C1 S1 108.87(12) . . no 
N1 C2 C1 113.20(15) . . no 
N1 C2 H2A 104.8(11) . . no 
C1 C2 H2A 110.9(11) . . no 
N1 C2 H2B 107.0(11) . . no 
C1 C2 H2B 114.2(11) . . no 
H2A C2 H2B 106.1(16) . . no 
C4 C3 N1 113.84(15) . . no 
C4 C3 H3A 106.2(11) . . no 
N1 C3 H3A 111.4(11) . . no 
C4 C3 H3B 111.9(12) . . no 
N1 C3 H3B 105.4(12) . . no 
H3A C3 H3B 108.0(16) . . no 
N2 C4 C3 113.29(15) . . no 
N2 C4 H4A 107.8(11) . . no 
C3 C4 H4A 109.7(11) . . no 
N2 C4 H4B 101.2(12) . . no 
C3 C4 H4B 112.9(12) . . no 
H4A C4 H4B 111.8(16) . . no 
N2 C5 C6 111.36(15) . . no 
N2 C5 H5A 107.3(11) . . no 
C6 C5 H5A 111.2(12) . . no 
N2 C5 H5B 109.0(11) . . no 
C6 C5 H5B 111.6(11) . . no 
H5A C5 H5B 106.1(16) . . no 
C9 C6 C5 101.59(16) . . no 
C9 C6 C10 113.31(17) . . no 
C5 C6 C10 114.92(16) . . no 
C9 C6 S2 108.29(14) . . no 
C5 C6 S2 112.28(12) . . no 
C10 C6 S2 106.40(13) . . no 
C1 C7 H7A 109.3(13) . . no 
C1 C7 H7B 109.2(13) . . no 
H7A C7 H7B 107.6(18) . . no 
C1 C7 H7C 111.6(13) . . no 
H7A C7 H7C 105.9(19) . . no 
H7B C7 H7C 113.2(19) . . no 
C1 C8 H8A 115.0(13) . . no 
C1 C8 H8B 108.1(13) . . no 
H8A C8 H8B 111.2(18) . . no 
C1 C8 H8C 113.3(14) . . no 
H8A C8 H8C 101.8(19) . . no 
H8B C8 H8C 107.1(18) . . no 
C6 C9 H9A 109.5(14) . . no 
C6 C9 H9B 113.5(11) . . no 
H9A C9 H9B 101.6(18) . . no 
C6 C9 H9C 104.2(15) . . no 
H9A C9 H9C 115(2) . . no 
H9B C9 H9C 113.2(19) . . no 
C6 C10 H10A 111.2(13) . . no 
C6 C10 H10B 114.2(13) . . no 
H10A C10 H10B 101.5(18) . . no 
C6 C10 H10C 105.9(13) . . no 
H10A C10 H10C 113.2(18) . . no 
H10B C10 H10C 111.1(18) . . no 
N1 C11 H11A 104.6(12) . . no 
N1 C11 H11B 109.3(13) . . no 
H11A C11 H11B 118.3(18) . . no 
N1 C11 H11C 107.3(14) . . no 
H11A C11 H11C 109.4(18) . . no 
H11B C11 H11C 107.6(18) . . no 
N2 C12 H12A 108.7(13) . . no 
N2 C12 H12B 106.1(11) . . no 
H12A C12 H12B 111.8(17) . . no 
N2 C12 H12C 107.8(14) . . no 
H12A C12 H12C 108.3(19) . . no 
H12B C12 H12C 113.9(18) . . no 
  
_diffrn_measured_fraction_theta_max    0.835 
_diffrn_reflns_theta_full              29.47 
_diffrn_measured_fraction_theta_full   0.835 
_refine_diff_density_max    0.488 
_refine_diff_density_min   -0.298 
_refine_diff_density_rms    0.063 


#=========================================================================
_publ_section_title
;
  ???
;

_publ_contact_author_name  'Grapperhaus, Craig A.'

_publ_contact_author_address     
; Department of Chemistry, University of Louisville, Louisville, KY 40292, USA
;

loop_
_publ_author_name
_publ_author_address
 'Grapperhaus, Craig A'
; Department of Chemistry
  University of Louisville
  Louisville, KY 40292, USA
;
 'Mullins, Chris'
; Department of Chemistry
  University of Louisville
  Louisville, KY 40292, USA
;
 'Mashuta, Mark S.'
; Department of Chemistry
  University of Louisville
  Louisville, KY 40292, USA
;


_publ_contact_author_phone  '502-852-5932'
_publ_contact_author_fax    '502-852-8149' 
_publ_contact_author_email  'craig.grapperhaus@louisville.edu'
_publ_requested_journal        'Inorg. Chem.' 
_publ_requested_coeditor_name  'Professor Edward Solomon'  
_publ_section_synopsis
; 
 ?
;

_publ_section_abstract
;
 ?
;

_publ_section_comment
; 
 ?  
;

_publ_section_exptl_prep

; 
 ?
;

_publ_section_exptl_refinement
;
 ?
;


_publ_section_references
;

 ?

;

_publ_section_figure_captions
;
 ?
;

_publ_section_table_legends
;
 ?
;

_publ_section_acknowledgements
;
 We thank the Kentucky Research Challenge Trust Fund for the 
 purchase of CCD X-ray equipment and upgrade of our X-ray facility.
;

#===END
